# Supplementary material
Source: publisher figshare collection journal article supplement (https://tandf.figshare.com/articles/dataset/_/21829239)
Supplement: Supplementary file 1 [file 1]

## **Tehditin Devam ettiği durumlarda Travma Sonrası Stres Bozukluğu: Nörobiyolojik ve Psikofizyolojik Bulguların Gözden Geçirilmesi**

Iro Fragkaki, Kathleen Thomaes, Marit Sijbrandij

### **Arkaplan**

Birçok çalışma tek bitmiş bir travma sonrası travma sonrası stres bozukluğunun (TSSB) nöroendokrinoyolojisini ve nörobiyolojisini araştırmasına rağmen, devam eden tehdit durumunda TSSB üzerine çalışmalar oldukça azdır ve bu iki gruptaki kişilerin benzer anormallikler gösterip göstermediği belirgin değildir. Amaç: Bu çalışmanın amacı devam eden tehdit durumundaki TSSB'nin nörobiyolojik ve nöroendokrin bulgularının bulunmasıdır. Devam eden tehdit TSSB ciddiyetini ve tedaviye cevabı önemli ölçüde etkilemektedir ve bu yüzden bitmiş travma sonrası oluşan TSSB'den bu durumun ve nöroendokrine farklılıklarını ayırmak oldukça faydalı bilgiler sağlayacaktır. Yöntem: yakın partner şiddetine maruz kalanlar, polis memurları, ve itfaiyecilerdeki TSSB ile ilgili olarak kortizol seviyelerini ve beyin fonksiyonlarını inceleyen çalışmalardan oluşan 18 çalışma kullanılmıştır. Sonuçlar: Hippokampal büyüklük devam eden tehdit altındaki TSSB durumunda azalırken, belirti ciddiyeti ile ilgili bir ilişki görülememiştir. Nörogörüntüleme çalışmaları devam eden tehdit durumunda amigdalada ve hipokampal gyrus büyüklüğünde azalma görülmemiştir. Biten travma sonrası TSSB'nin bilişsel devre parçaları (neurocircuitry) modeli amigdalada yüksek aktivasyonun; devam eden tehdit durumundaki TSSB'de PFC ve hipokampusünün anormal olarak aktif olmadığı onaylanmıştır. Nöroendokrin çalışmaları artan ve azalan, ya da kortizol seviyesi ve devam eden tehdit durumundaki TSSB ile aralarında ilişki yok şeklinde tutarlılık göstermeyen bulgular sunmaktaydı.

Tartışma: Devam eden tehdit altında TSSB anormal sinirsel devre parçaları bitmiş travma sonrası TSSB'dekine benzerlikler gösterse de bunlar diğer nörobiyolojik ve nöroendokrin bulgularına özgüdür. Halihazırda yüksek kortizol seviyeleri sergileyebilme ihtimali olan devam eden tehdit altındaki TSSBli hastalara kortizol uygulamadan önce daha net sonuçlar çıkarmak için devam eden ve bitmiş arasındaki direk karşılaştırmalar gelecek çalışmalar için gereklidir.

**Anahtar Kelimeler:** TSSB, devam eden tehdit, nörobiyoloji, nöroendokrinoloji, kortizol, hipokampus, amigdala

Name of translator: Seray Akça

Citation: European Journal of Psychotraumatology 2016, 7: 30915 - <http://dx.doi.org/10.3402/ejpt.v7.30915>
