# Supplementary material
Source: publisher figshare collection journal article supplement (https://tandf.figshare.com/articles/dataset/_/21829239)
Supplement: Supplementary file 2 [file 1]

## Posttraumatic Stress Disorder under Ongoing Threat: A Review of Neurobiological and Neuroendocrine Findings

Iro Fragkaki, MSc.<sup>a§</sup>, Kathleen Thomaes, MD/Ph.D<sup>b</sup>, Marit Sijbrandij, Ph.D.<sup>c</sup>

*Εισαγωγή:* Παρά το γεγονός ότι ένας σημαντικός αριθμός μελετών έχουν εξετάσει το νευροβιολογικό και νευροενδοκρινολογικό μοντέλο της Διαταραχής Μετατραυματικού Στρες (ΔΜΣ) έπειτα από ένα μεμονωμένο τραυματικό γεγονός του παρελθόντος, οι ερευνητικές μελέτες αναφορικά με τη ΔΜΣ υπό συνεχή απειλή είναι περιορισμένες και παραμένει άγνωστο εάν οι ασθενείς αυτοί παρουσιάζουν παρόμοιες δυσλειτουργίες. *Στόχος:* Ο στόχος της παρούσας μελέτης είναι να συνοψίσει τα νευροβιολογικά και νευροενδοκρινολογικά ευρήματα της ΔΜΣ υπό συνεχή απειλή. Η συνεχής απειλή επηρεάζει σημαντικά τη σοβαρότητα της ΔΜΣ και τη θεραπευτική αντιμετώπισή της και επομένως ο διαχωρισμός των νευροβιολογικών και νευροενδοκρινολογικών διαφορών ανάμεσα στη ΔΜΣ έπειτα από ένα τραυματικό γεγονός του παρελθόντος και στη ΔΜΣ υπό συνεχή απειλή μπορεί να προσφέρει σημαντικές πληροφορίες για τη θεραπεία. *Μέθοδος:* Δεκαοχτώ ερευνητικές μελέτες που εξέτασαν την εγκεφαλική λειτουργία και τα επίπεδα κορτιζόλης σε συσχέτιση με τη ΔΜΣ υπό συνεχή απειλή σε άτομα που βιώνουν ενδοοικογενειακή βία, αστυνομικούς και πυροσβέστες συμπεριλήφθηκαν στην παρούσα μελέτη. *Αποτελέσματα:* Ο όγκος του ιπποκάμπου ήταν μειωμένος στη ΔΜΣ υπό συνεχή απειλή, αλλά δεν ήταν συστηματικά σχετιζόμενος με τη σοβαρότητα των κλινικών συμπτωμάτων. Οι νευροβιολογικές μελέτες έδειξαν ότι η ΔΜΣ υπό συνεχή απειλή δεν παρουσιάζει μειωμένο όγκο της αμυγδαλής και της παραϊπποκάμπιας έλικας. Η ΔΜΣ υπό συνεχή απειλή παρουσίασε παρόμοιες νευροβιολογικές δυσλειτουργίες με το νευροβιολογικό μοντέλο της ΔΜΣ μετά από ένα τραυματικό γεγονός του παρελθόντος, το οποίο χαρακτηρίζεται από υπερλειτουργία της αμυγδαλής και υπολειτουργία του προμετωπιαίου φλοιού και του ιπποκάμπου. Τα νευροενδοκρινολογικά ευρήματα ήταν αντιφατικά, καθώς παρουσίασαν αυξημένα και μειωμένα επίπεδα κορτιζόλης ή καμία συσχέτιση ανάμεσα στα επίπεδα κορτιζόλης και τη ΔΜΣ υπό συνεχή απειλή. *Συμπεράσματα:* Παρόλο που η ΔΜΣ υπό συνεχή απειλή παρουσίασε νευροβιολογικές δυσλειτουργίες παρόμοιες με αυτές που έχουν βρεθεί στη ΔΜΣ μετά από ένα τραυματικό γεγονός του παρελθόντος, τα ευρήματα ήταν λιγότερο συστηματικά για ογκομετρικές ανωμαλίες και για τα νευροενδοκρινολογικά ευρήματα. Ως εκ τούτου, κρίνεται απαραίτητη η διεξαγωγή ερευνητικών μελετών που θα επικεντρώνονται στην άμεση σύγκριση ασθενών με ΔΜΣ υπό συνεχή απειλή και ασθενών με ΔΜΣ μετά από ένα τραυματικό γεγονός του παρελθόντος, προκειμένου να επιτευχθεί η εξαγωγή ακριβέστερων συμπεράσματος πριν τη χορήγηση κορτιζόλης σε ασθενείς με ΔΜΣ υπό συνεχή απειλή, οι οποίοι ενδέχεται να έχουν ήδη αυξημένα επίπεδα κορτιζόλης.

**Citation:** European Journal of Psychotraumatology 2016, 7: 30915 - <http://dx.doi.org/10.3402/ejpt.v7.30915>
