# Supplementary material
Source: publisher figshare collection journal article supplement (https://tandf.figshare.com/articles/dataset/_/21829239)
Supplement: Supplementary file 3 [file 1]

## **Posttraumatische Belastungsstörung unter anhaltender Bedrohung: Eine Review neurobiologischer und psychophysiologischer Erkenntnisse**

Iro Fragkaki, Kathleen Thomaes, Marit Sijbrandij

Hintergrund: Obwohl zahlreiche Studien die Neurobiologie und Neuroendokrinologie der Posttraumatischen Belastungsstörung (PTBS) nach einem einzelnen, abgeschlossenen Trauma erforscht haben, sind Studien über PTBS unter anhaltender Bedrohung selten und es ist noch immer unklar, ob betroffene Individuen vergleichbare Abnormitäten aufweisen.

Ziel: Der Zweck dieser Review ist es, die neurobiologischen und neuroendokrinen Erkenntnisse über PTBS unter anhaltender Bedrohung zu präsentieren. Anhaltende Bedrohung beeinflusst die Schwere und den Behandlungserfolg von PTBS maßgeblich, weshalb die Entflechtung ihrer neurobiologischen und neuroendokrinen Unterschiede von einer PTBS nach einem abgeschlossenen Trauma nützliche Informationen für die Behandlung bereitstellen könnte.

Methode: Achtzehn Studien wurden inkludiert, die die Funktionsweise des Gehirns und den Cortisolspiegel im Zusammenhang mit PTBS bei Individuen erhoben, die entweder Gewalt durch den Intimpartner ausgesetzt oder Polizisten oder Feuerwehrmänner waren.

Ergebnisse: Das Volumen des Hippocampus nahm bei PTBS unter anhaltender Bedrohung ab, wurde jedoch nicht durchgängig mit der Schwere der Symptome assoziiert. Die bildgebenden Studien zeigten, dass PTBS unter anhaltender Bedrohung nicht durch ein reduziertes Volumen der Amygdala oder des parahippocampalen Gyrus charakterisiert war. Das Neurocircuitry Modell der PTBS nach abgeschlossenem Trauma, das eine Überaktivierung der Amygdala und eine Unteraktivierung des PFC und des Hippocampus statiert, konnte auch bei PTBS unter anhaltender Bedrohung bestätigt werden. Die neuroendokrinen Befunde waren inkonsistent und zeigten eine Zunahme, Abnahme oder gar keine Assoziation zwischen dem Cortisolspiegel und PTBS unter anhaltender Bedrohung.

Konklusionen: Obwohl PTBS unter anhaltender Bedrohung, ähnlich zu früheren Befunden von PTBS nach einem abgeschlossenen Trauma, durch abnormale Muster in den neuronalen Vernetzungen charakterisiert ist, unterscheidet sich die Befundlage bei den anderen neurobiologischen und vor allem neuroendokrinen Ergebnissen durchaus. In zukünftiger Forschung werden direkte Vergleiche zwischen Stichproben mit anhaltendem und abgeschlossenem Trauma benötigt. Auf diese Weise können solidere Schlüsse gezogen werden, bevor Patienten mit PTBS unter anhaltender Bedrohung Cortisol verabreicht wird, die möglicherweise bereits einem erhöhten endogenen Cortisolspiegel ausgesetzt sind.

Stichwörter: PTBS, anhaltende Bedrohung, Neurobiologie, Neuroendokrinologie, Cortisol, Hippocampus, Amygdala.

Name of translator: Alexander Haselgruber, Brigitte Lueger-Schuster
