# Supplementary material
Source: publisher figshare collection journal article supplement (https://tandf.figshare.com/articles/dataset/_/21829239)
Supplement: Supplementary file 4 [file 1]

Zaburzenie po stresie traumatycznym pod wpływem powtarzającej się traumy: przegląd danych neurobiologicznych i psychofizjologicznych.

Iro Fragkaki, Kathleen Thomaes, Marit Sijbrandij

Wprowadzenie: Pomimo istnienia bardzo dużej ilości badań na temat neurobiologicznych i neuroendykronologicznych podstaw zaburzenia po stresie traumatycznym wywołanym pojedynczą traumą, niewiele wiadomo na temat analogicznych etiologii PTSD wywołanego powtarzającą się traumą

Cel: Celem niniejszej pracy było dokonanie przeglądu literaturowego na temat neurobiologicznych i psychofizjologicznych podstaw PTSD wywołanego powtarzającą się traumą. Tego rodzaju trauma w sposób istotny wpływa na nasilenie objawów PTSD.

Metoda: Dokonano przeglądu osiemnastu prac na temat funkcjonowania mózgu oraz poziomu kortyzolu w relacji do PTSD wśród osób, które przeżyły powtarzającą się traumę przemocy w związku, jak również wśród policjantów i strażaków, również eksponowanych na ciągłą, powtarzającą się traumą związaną z wykonywaniem zawodu.

Wyniki: Zauważono istotne zmniejszenie powierzchni hipokampu wśród osób narażonych na powtarzającą się traumę, choć nie było to związane z nasileniem objawów PTSD. Wśród takich osób nie odnotowano natomiast zmniejszenia się powierzchni ciała migdałowatego.

Konkluzje: Chociaż PTSD wywołane powtarzającą się traumą może spowodować istotne zmiany w funkcjonowaniu mózgu, to jednak potrzeba wciąż nowych badań porównawczych, szczególnie wśród innych populacji narażonych na powtarzającą się traumę.

Keywords: PTSD, powtarzająca się trauma, neurobiologia, neuroendykronologia, kortyzol, hipokamp, ciało migdałowate

Name of translator: Marcin Rzeszutek, University of Finance and Management in Warsaw, Poland
