# Supplementary material
Source: publisher figshare collection journal article supplement (https://tandf.figshare.com/articles/dataset/_/21829239)
Supplement: Supplementary file 5 [file 1]

## **Title 持续威胁下创伤后应激障碍的神经生物学和精神生理学研究综述**

Iro Fragkaki, Kathleen Thomaes, Marit Sijbrandij

### **Abstract**

**背景：**虽然许多研究调查了单次创伤事件后的创伤后应激障碍（PTSD）的神经生物学和神经内分泌学，但对面临持续威胁的 PTSD 患者的研究很少，目前还不清楚这些个体是否有类似异常。

**目的：**本综述的目的是呈现面临持续威胁的 PTSD 患者神经生物学和神经内分泌的研究。持续的威胁会大大影响创伤后应激障碍的严重程度和治疗反应，因此，理清该情况与单次创伤后 PTSD 神经生物学和神经内分泌的差异可以对治疗提供有用信息。

**方法：**18 项研究调查了暴露于亲密伴侣暴力、警察和消防战士的大脑功能及皮质醇水平与 PTSD 的关系。

**结果：**面临持续威胁的 PTSD 患者海马体积减少，这种情况与症状的严重程度没有明显关联。神经影像学研究显示，持续威胁下的 PTSD 患者杏仁核或海马旁回体积未发现有减少。单次创伤 PTSD 患者的神经环路模型中杏仁核过度激活，前额叶皮层及海马激活降低，在面临持续威胁的 PTSD 患者也存在。面临持续威胁下，神经内分泌的研究结果是不一致的，皮质醇水平增加、减少，或者和 PTSD 没有关系。

**结论：**面临持续威胁的 PTSD 患者表现出特征性的异常神经环路模式，该模式与单次创伤事件后 PTSD 的发现类似，但在其它神经生物学特别是神经内分泌的发现并不一致。未来的研究中可以通过对面临持续威胁的 PTSD 患者与单次创伤事件后皮质醇水平持续升高的 PTSD 患者比较，这样可得出更坚实的结论。

**Keywords:** PTSD，持续威胁，神经生物学、神经内分泌学、皮质醇、海马、杏仁核

**Name of translator:** Jiezheng Dong, Zhonglin Tan

**Citation:** European Journal of Psychotraumatology 2016, 7: 30915 - <http://dx.doi.org/10.3402/ejpt.v7.30915>
