# Supplementary material
Source: publisher figshare collection journal article supplement (https://tandf.figshare.com/articles/dataset/_/21829239)
Supplement: Supplementary file 6 [file 1]

## **Title: Пост-травматическое стрессовое расстройство при текущей угрозе: обзор результатов нейробиологических и психофизиологических исследований**

Iro Fragkaki, Kathleen Thomaes, Marit Sijbrandij

Исходная информация: Не смотря на то, что изучению нейробиологии и нейроэндокринологии Пост- травматического стрессового расстройства (ПТСР) вызванного воздействием единичного травматического стрессора прекратившего воздействие, посвящено большое число исследований, очень мало исследований изучавших ПТСР при текущей угрозе. Следовательно, мало известно о том, насколько индивиды подвергающиеся текущей угрозе страдают от тех же отклонений, как те, кто подвергся однократному воздействию стрессора.

Задача: Целью данного обзора является рассмотрение исследовательских находок по нейробиологии и нейроэндокринологии ПТСР при текущей угрозе. Так как текущая угроза значительно влияет на остроту ПТСР и соответствующее лечебное вмешательство, различие его нейробиологической и нейроэндокринной специфики от специфики присущей завершённой травме может обеспечить полезную для лечения информацию.

Метод: Мы рассмотрели восемнадцать исследований изучавших функционирование мозга и уровень кортизола при ПТСР у индивидов подвергающихся насилию со стороны интимного партнера, у офицеров полиции, и у пожарников.

Результаты: Объем гиппокампа был уменьшен при ПТСР проходившем при текущей угрозе, хотя это не ассоциировалось с остротой симптомов. Исследования нейровизуализации (neuroimaging studies) выявили, что ПТСР при текущей угрозе не свойственно уменьшение объема амигдалы или парагиппокампальной извилины (parahippocampal gyrus). Нейроциркуитральная модель ПТСР (The neurocircuitry model of PTSD) при завершённой травме, с гиперактивацией амигдалы и гипоактивацией префронтального кортекса и гиппокампа подтвердилась также и в случае ПТСР при текущей угрозе. Нейроэндокринные находки исследования были непоследовательны и выявляли увеличенную, пониженную или никакую ассоциацию между уровнем кортизола и ПТСР при текущей угрозе.

Выводы: Тогда как в случае ПТСР при текущей угрозе наблюдаются такие же проблемные паттерны нейроциркуитральности (neurocircuitry) как и в случае ПТСР с завершённой травмой, подобное сходство не наблюдается в случае других нейробиологических и особенно, нейроэндокринных находок. В будущих исследованиях нужно провести непосредственное сравнение выборок с завершённой и текущей травмами для выработки более солидных выводов/причин для назначения кортизола пациентам с ПТСР при текущей угрозе, которые могут и так уже иметь повышенный уровень эндогенного кортизола.

Keywords: ПТСР, текущая угроза, нейробиология, нейроэндокринология, кортизол, гиппокампус, амигдала

Name of translator: Jana Darejan Javakhishvili
